# Supplementary material for: Application of Safirinium N-Hydroxysuccinimide Esters to Derivatization of Peptides for High-Resolution Mass Spectrometry, Tandem Mass Spectrometry, and Fluorescent Labeling of Bacterial Cells
Source: MDPI journal article supplement (doi:10.3390/ijms21249643), 2020-12-17
Supplement: s1 [file s1]

# Application of *Safirinium* N-Hydroxysuccinimide Esters to Derivatization of Peptides for High-Resolution Mass Spectrometry, Tandem Mass Spectrometry, and Fluorescent Labeling of Bacterial Cells

Joanna Fedorowicz <sup>1,\*†</sup>, Magdalena Wierzbicka <sup>2,†</sup>, Marek Cebrat <sup>2</sup>, Paulina Wiśniewska <sup>3</sup>, Rafał Piątek <sup>4</sup>, Beata Zalewska-Piątek <sup>4</sup>, Zbigniew Szewczuk <sup>2</sup> and Jarosław Sączewski <sup>3</sup>

<sup>1</sup> Department of Chemical Technology of Drugs, Faculty of Pharmacy, Medical University of Gdańsk, Al. Gen. J. Hallera 107, 80-416 Gdańsk, Poland

<sup>2</sup> Faculty of Chemistry, University of Wrocław, ul. F. Joliot-Curie 14, 50-383 Wrocław, Poland; magdalena.wierzbicka@chem.uni.wroc.pl (M.W.); marek.cebrat@chem.uni.wroc.pl (M.C.); zbigniew.szewczuk@chem.uni.wroc.pl (Z.S.)

<sup>3</sup> Department of Organic Chemistry, Faculty of Pharmacy, Medical University of Gdańsk, Al. Gen. J. Hallera 107, 80-416 Gdańsk, Poland; pauwis93@gumed.edu.pl (P.W.); js@gumed.edu.pl (J.S.)

<sup>4</sup> Department of Molecular Biotechnology and Microbiology, Chemical Faculty, Gdańsk University of Technology, Narutowicza 11/12, 80-233 Gdańsk, Poland; rafpiatek@pg.edu.pl (R.P.); beazalew@pg.edu.pl (B.Z.-P.)

\* Correspondence: jfedorowicz@gumed.edu.pl; Tel.: +48-58-349-1957

† These authors contributed equally to this work.

Received: 21 November 2020; Accepted: 15 December 2020; Published: date

## Table of Contents:

Figure S1. UV-light induced fluorescence of bacterial pellets of following strains: (a) *E. coli*-pET30 labeled with *Safirinium*, (b) *E. coli*-GFP, (c) *E. coli*-DsRed2 and (d) non-labeled *E. coli*-pET30.

Figure S2. Visualization of floating *E. coli*-pET30 bacteria labeled with *Safirinium* **5a** using (a) phase-contrast microscopy and fluorescence microscopy with filter sets dedicated to: (b) DAPI (blue fluorescence), (c) GFP (green fluorescence) and (d) TRITC (red fluorescence). Scale bars correspond to 20  $\mu$ m.

Figure S3. <sup>1</sup>H-NMR spectrum of **3b**

Figure S4. <sup>13</sup>C-NMR spectrum of **3b**

Figure S5. <sup>1</sup>H-NMR spectrum of **5b**

Figure S6. <sup>13</sup>C-NMR spectrum of **5b**

Figure S7. <sup>1</sup>H-NMR spectrum of **5c**

Figure S8. <sup>13</sup>C-NMR spectrum of **5c**

Figure S9. HPLC chromatogram of **8**

Video S1. Representative time lapse videos of PBS suspension of *E. coli*-pET30 bacteria labelled with *Safirinium* **5a** visualized by phase-contrast and fluorescence microscopy. The accelerated video corresponds to 2.5 sec. of phase contrast and 40 sec. of fluorescence original records. The focus was set to the dish bottom.

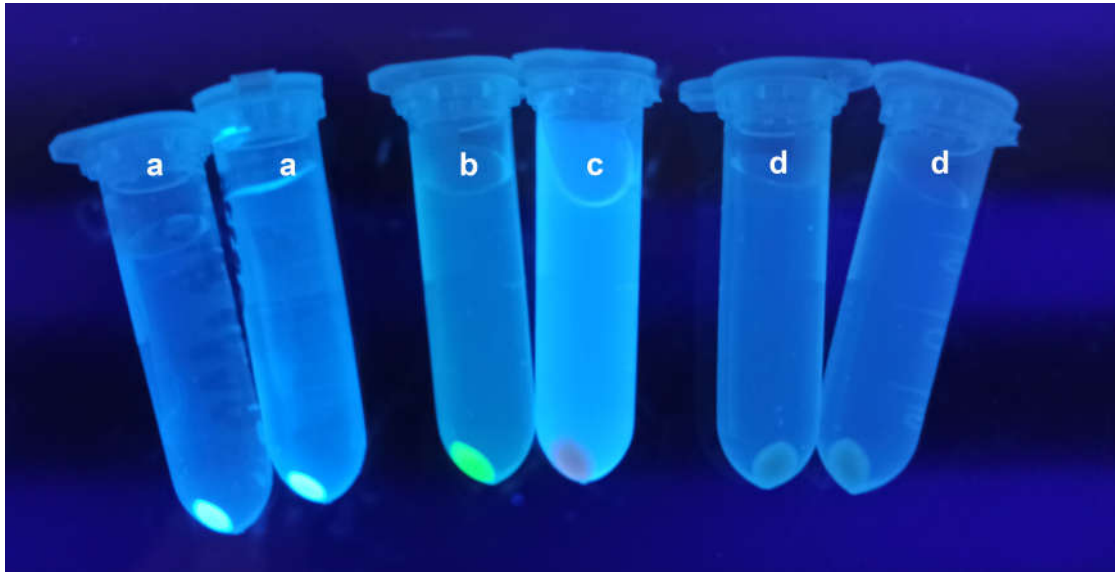

**Figure S1.** UV-light induced fluorescence of bacterial pellets of following strains: (a) *E. coli*-pET30 labeled with *Safirinum 5a*, (b) *E. coli*-GFP, (c) *E. coli*-DsRed2 and (d) non-labeled *E. coli*-pET30.

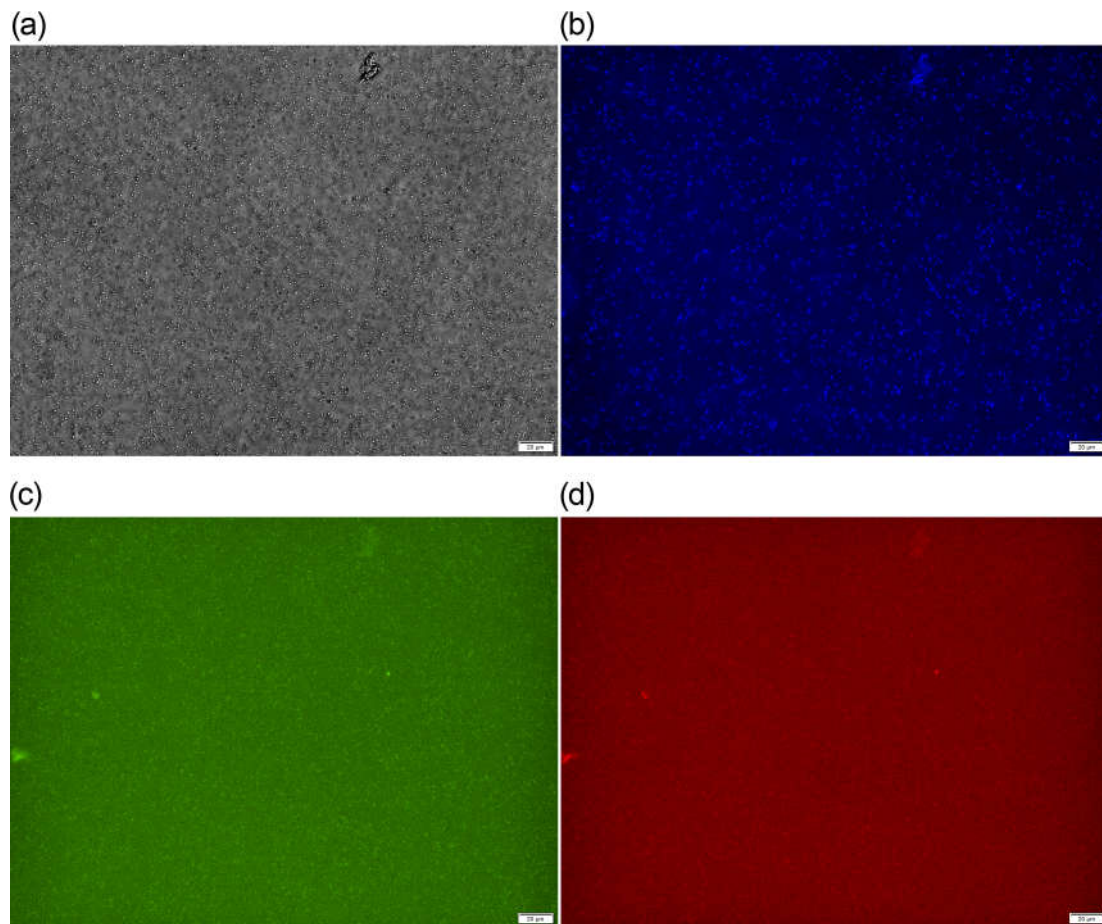

**Figure S2.** Visualization of floating *E. coli*-pET30 bacteria labeled with *Safirinum 5a* using (a) phase-contrast microscopy and fluorescence microscopy with filter sets dedicated to: (b) DAPI (blue fluorescence), (c) GFP (green fluorescence) and (d) TRITC (red fluorescence). Scale bars correspond to 20  $\mu\text{m}$ .

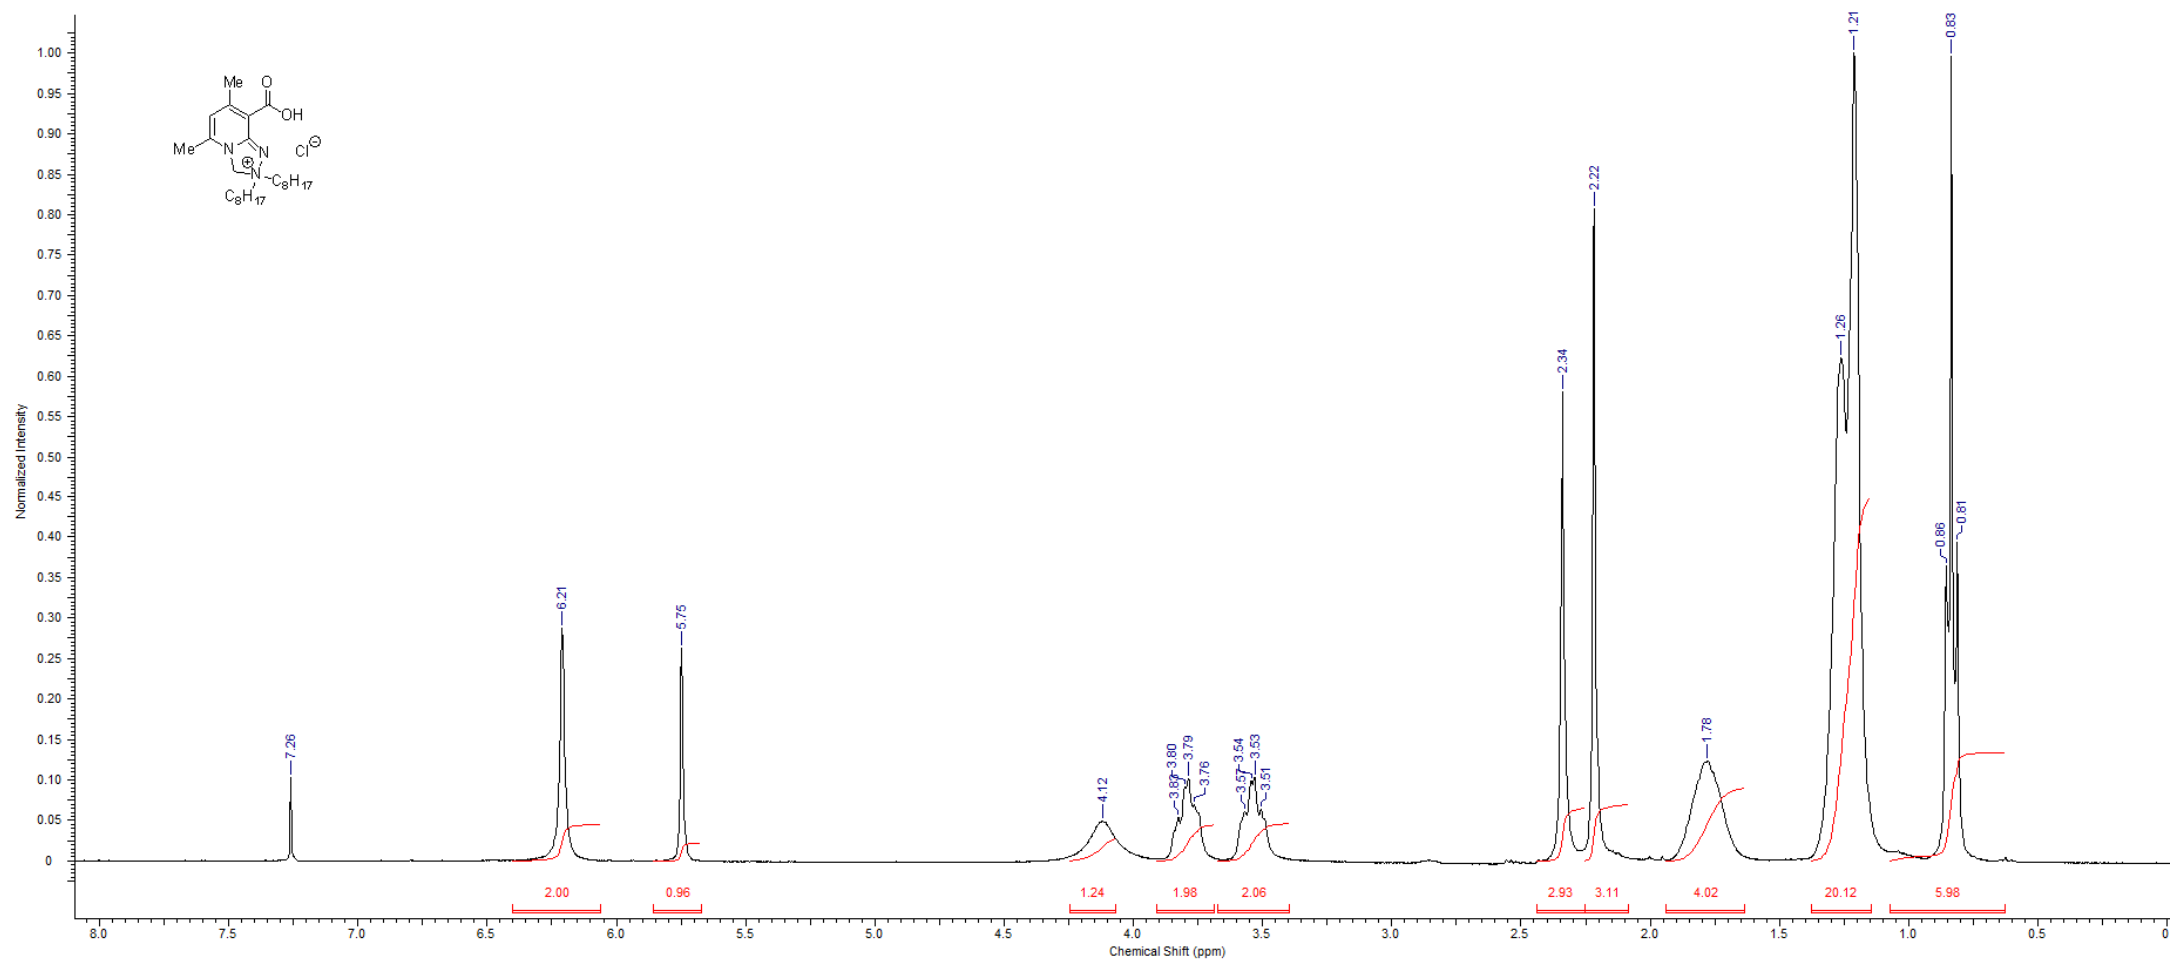

Figure S3.  $^1\text{H}$ -NMR spectrum of **3b**

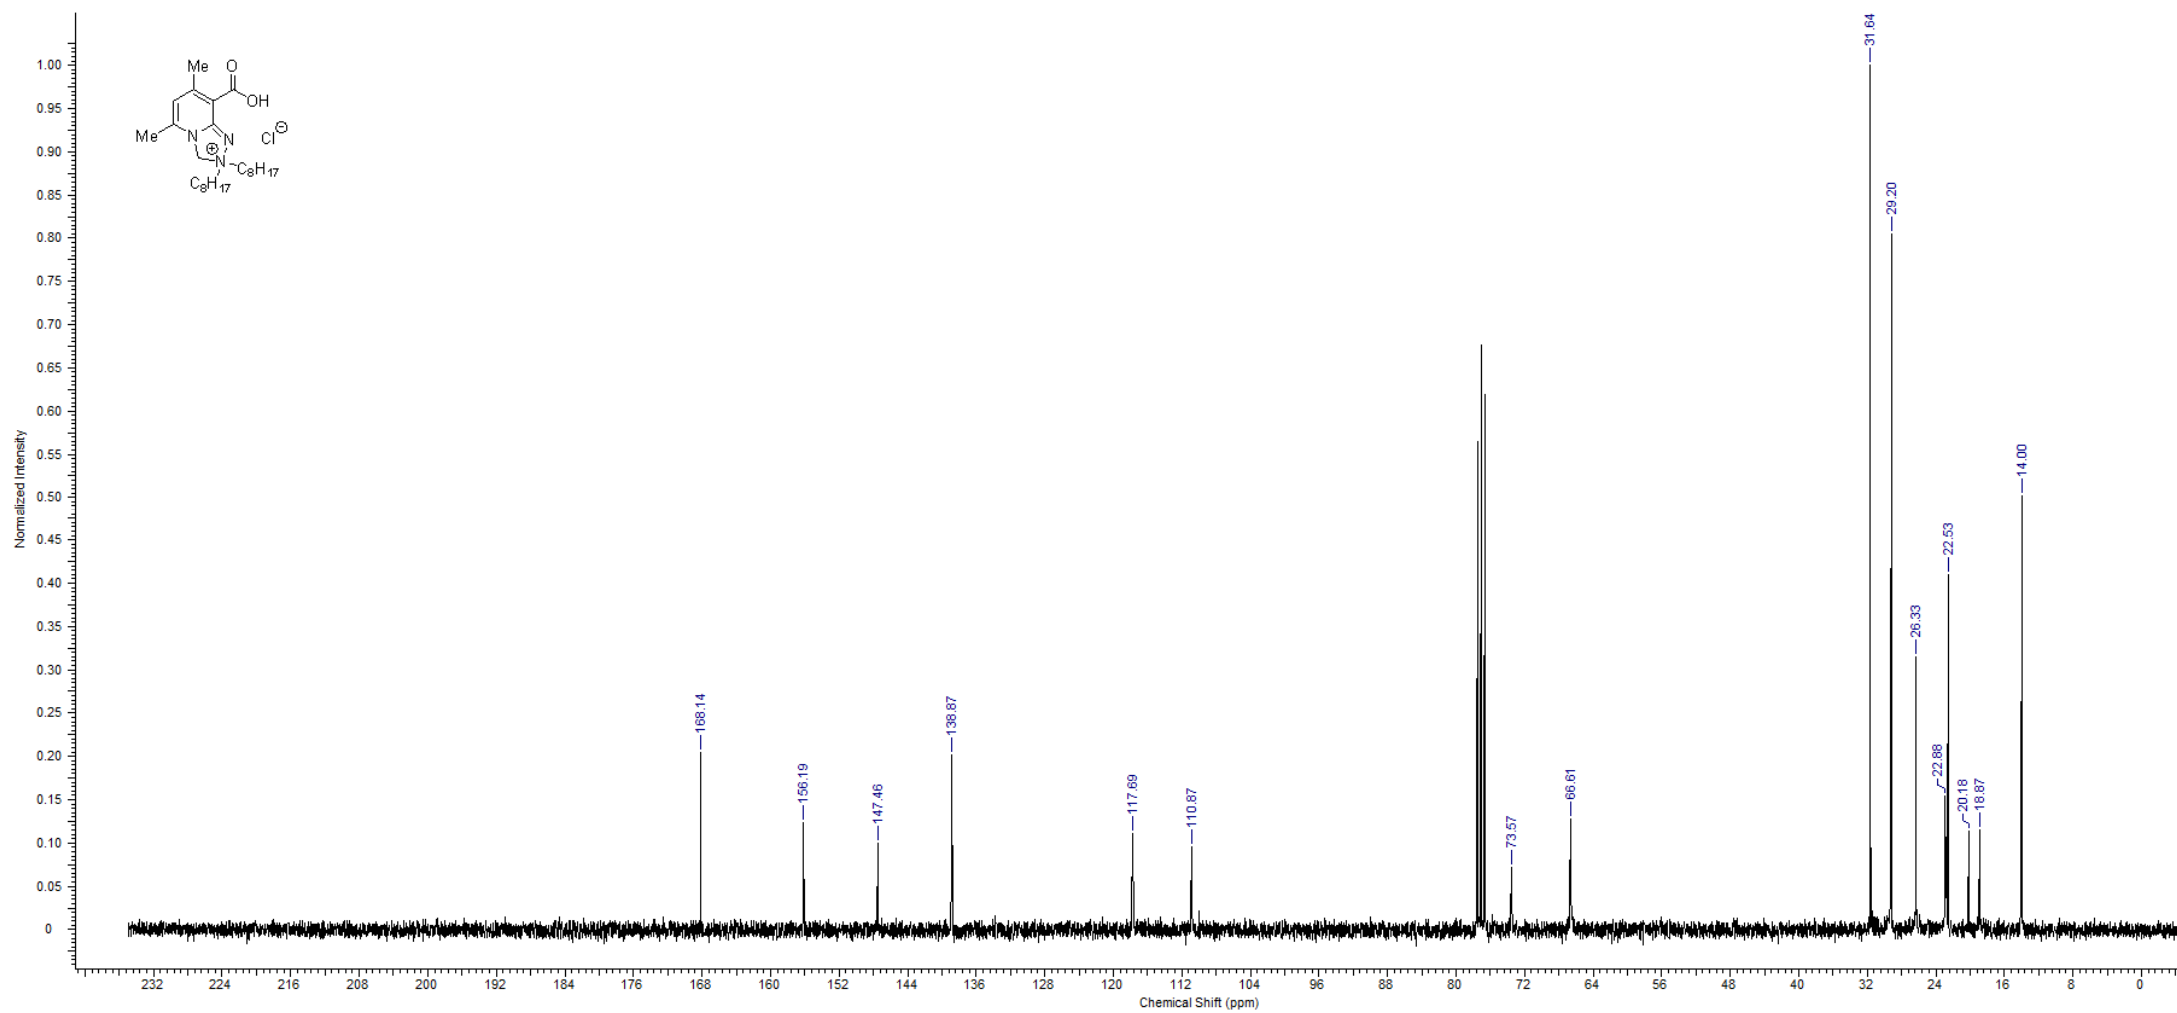

**Figure S4.**  $^{13}\text{C}$ -NMR spectrum of **3b**

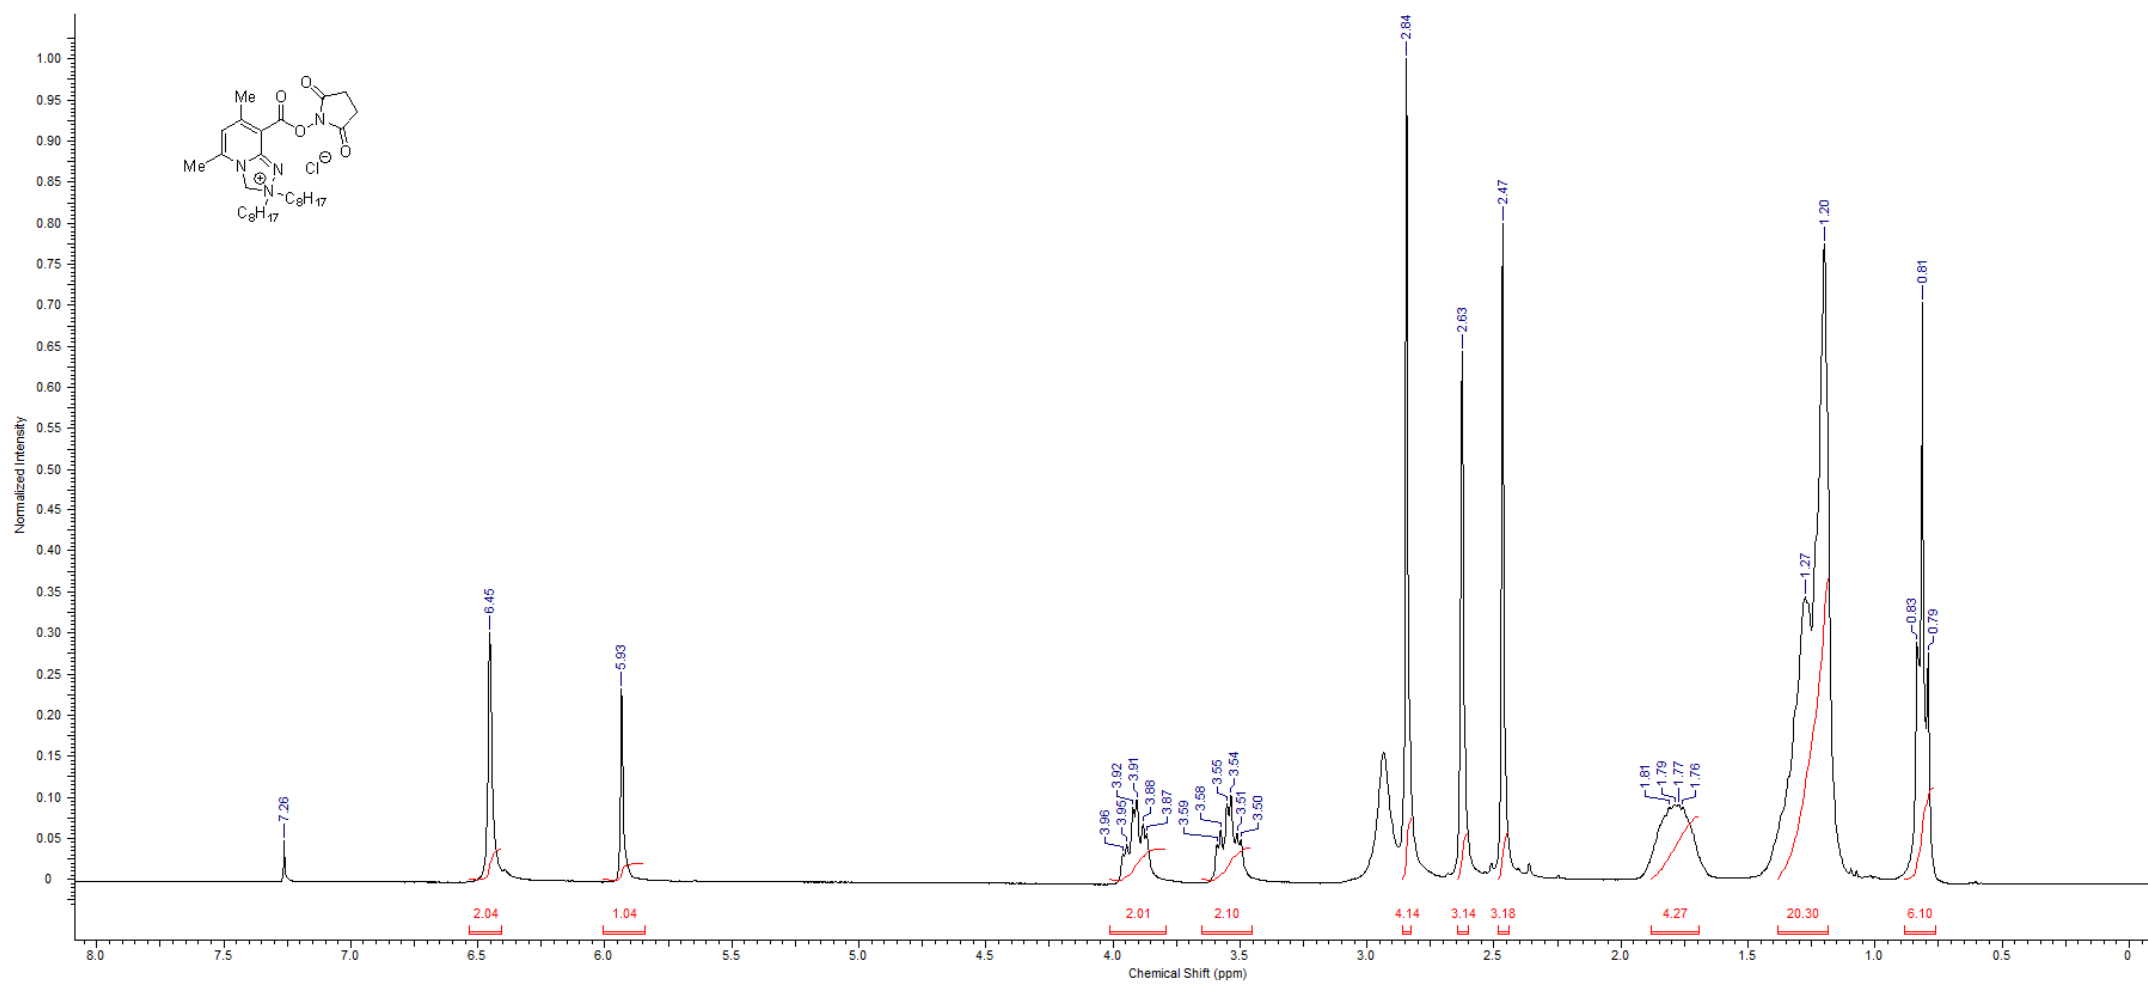

Figure S5.  $^1\text{H}$ -NMR spectrum of **5b**

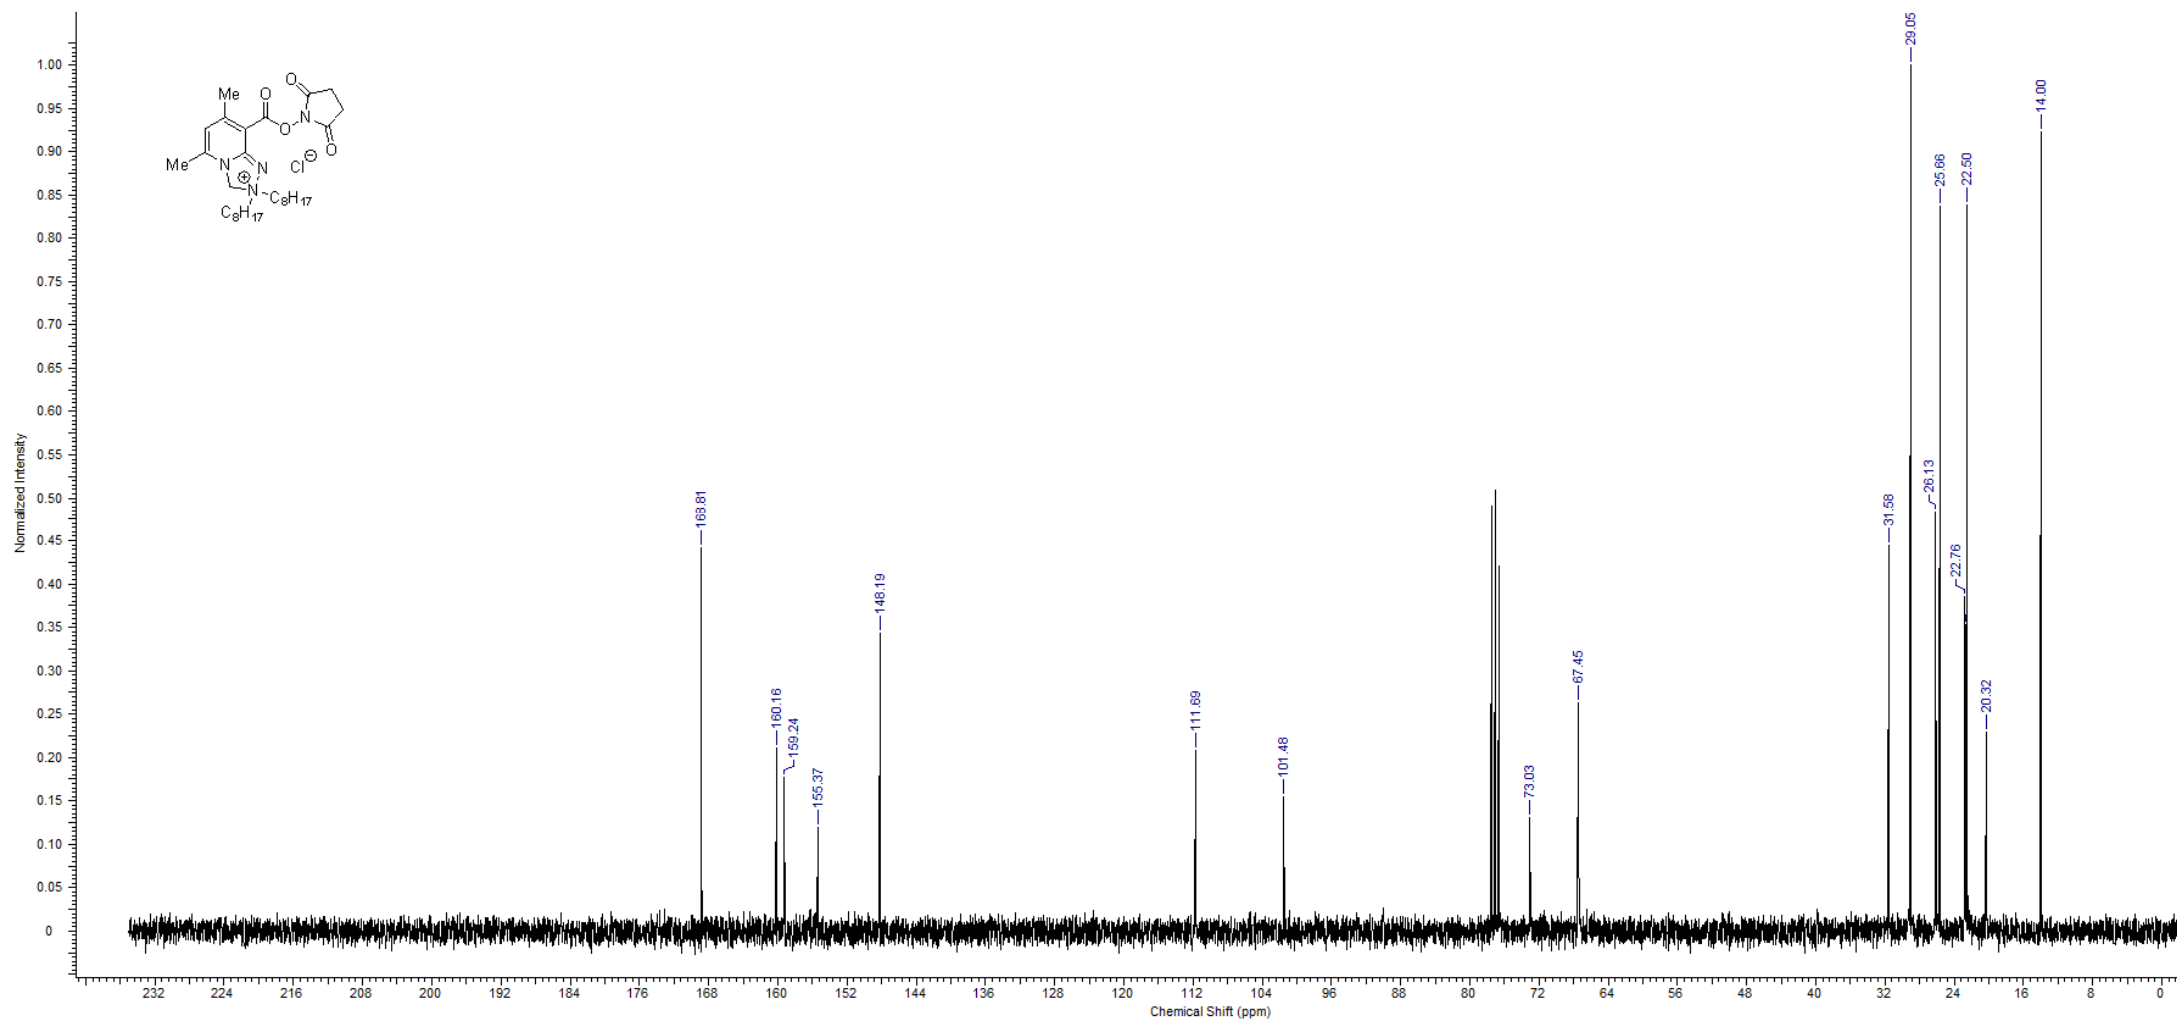

**Figure S6.**  $^{13}\text{C}$ -NMR spectrum of **5b**

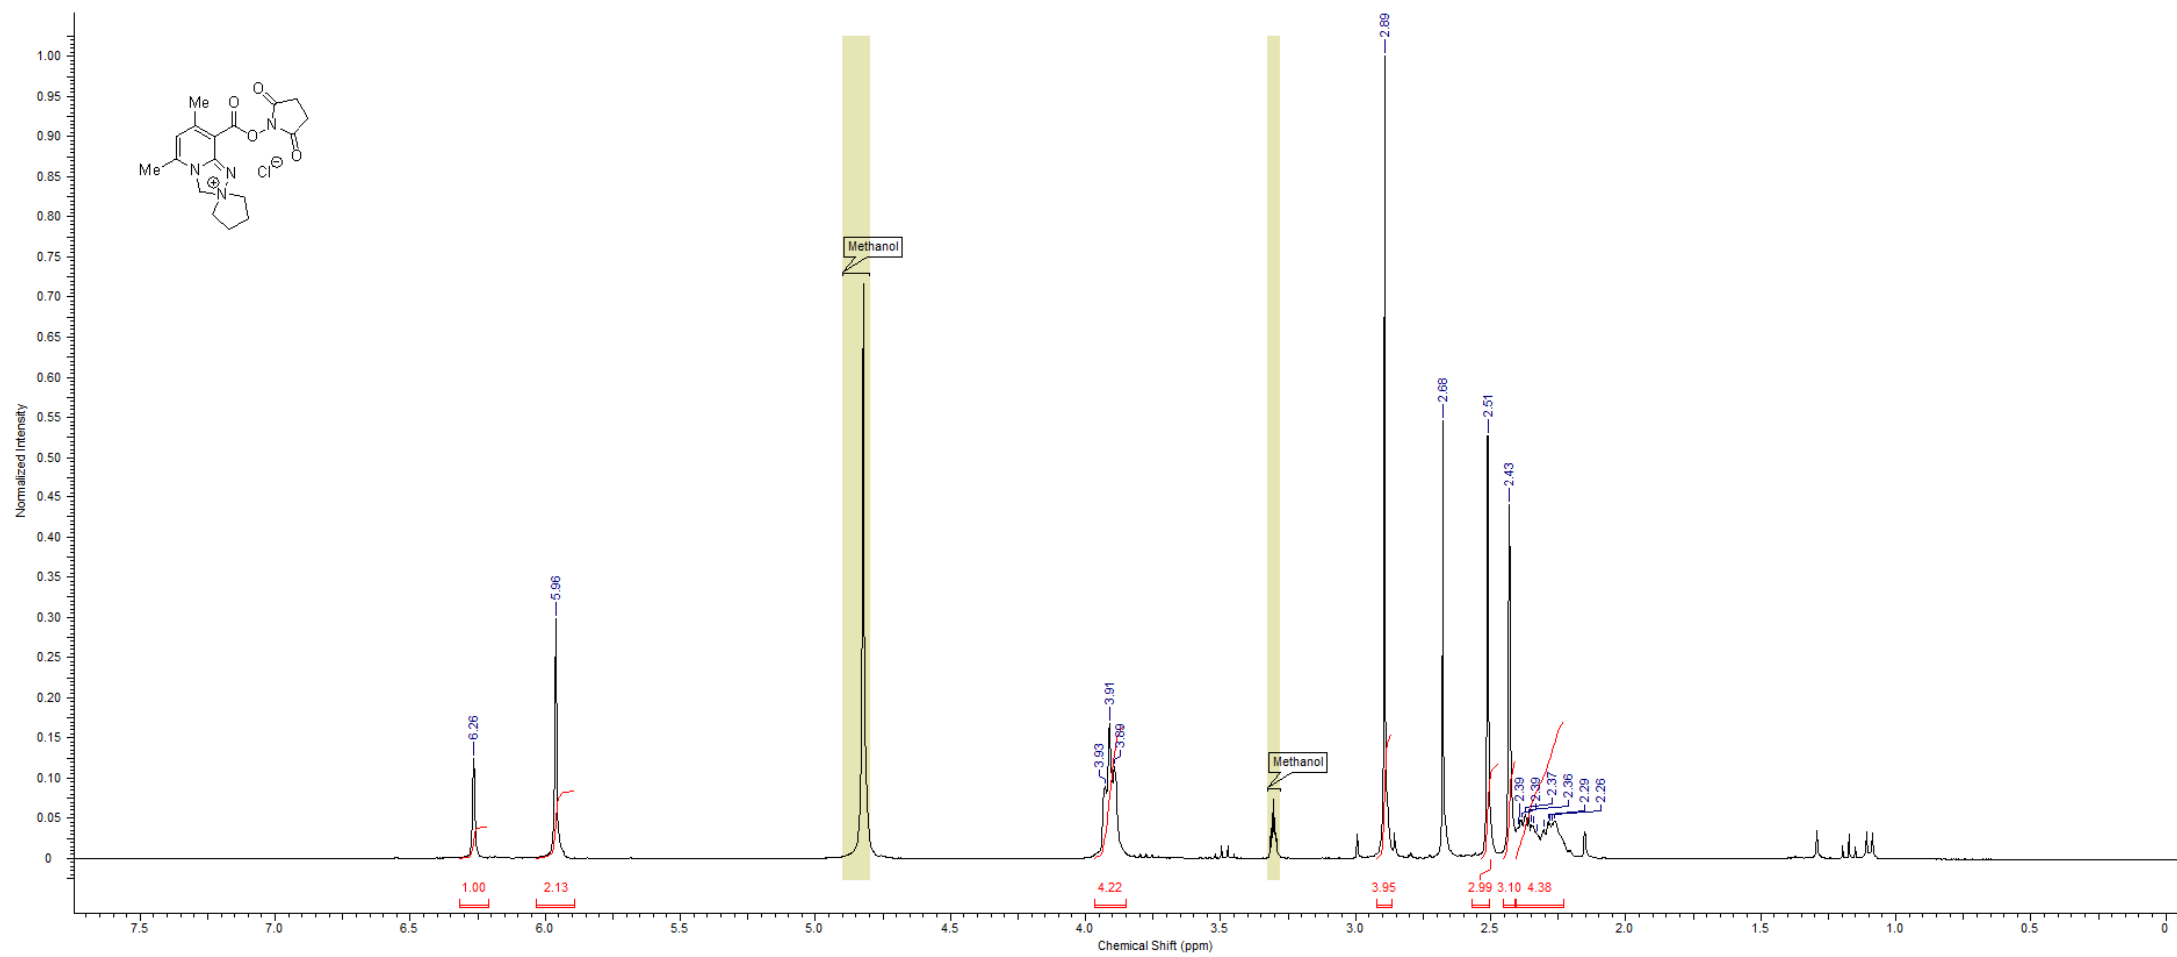

**Figure S7.** <sup>1</sup>H-NMR spectrum of **5c**

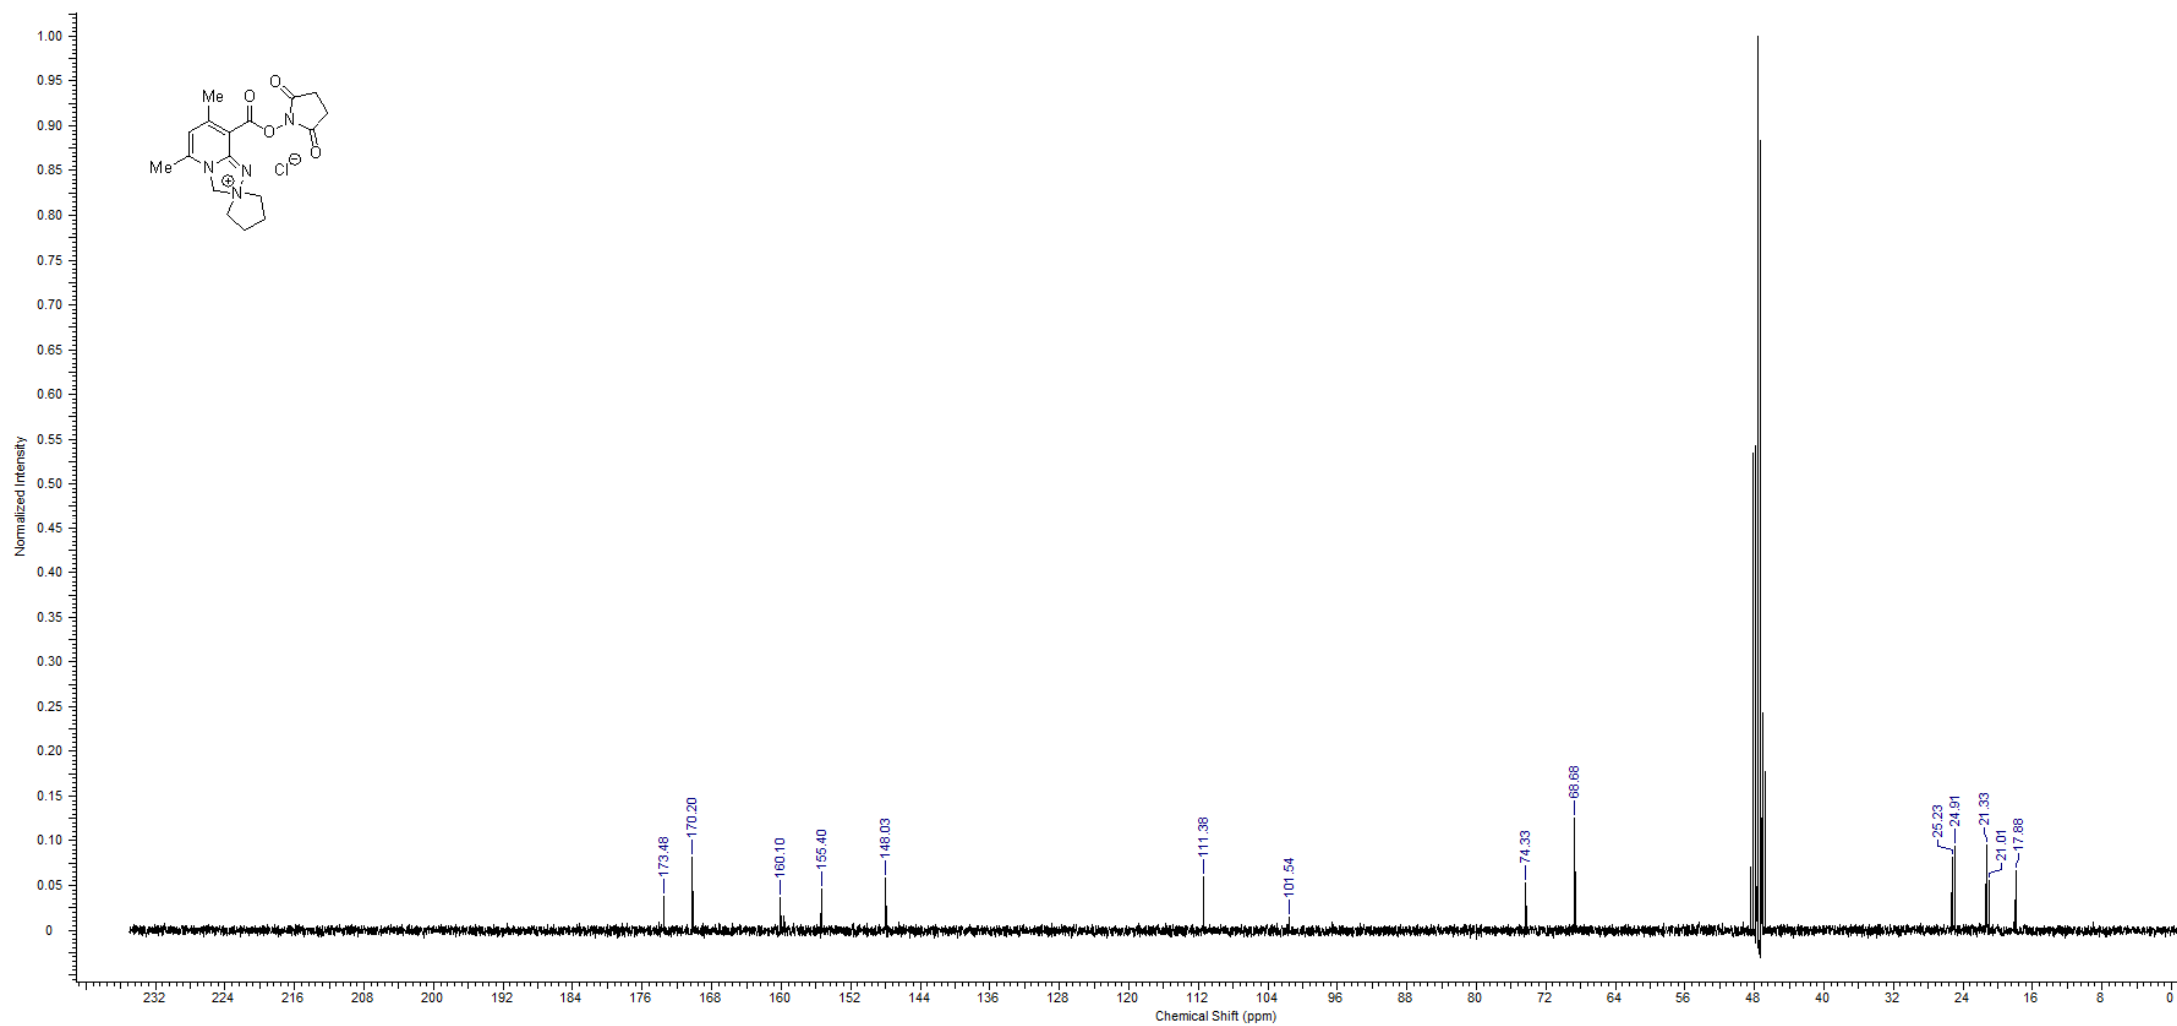

Figure S8.  $^{13}\text{C}$ -NMR spectrum of **5c**



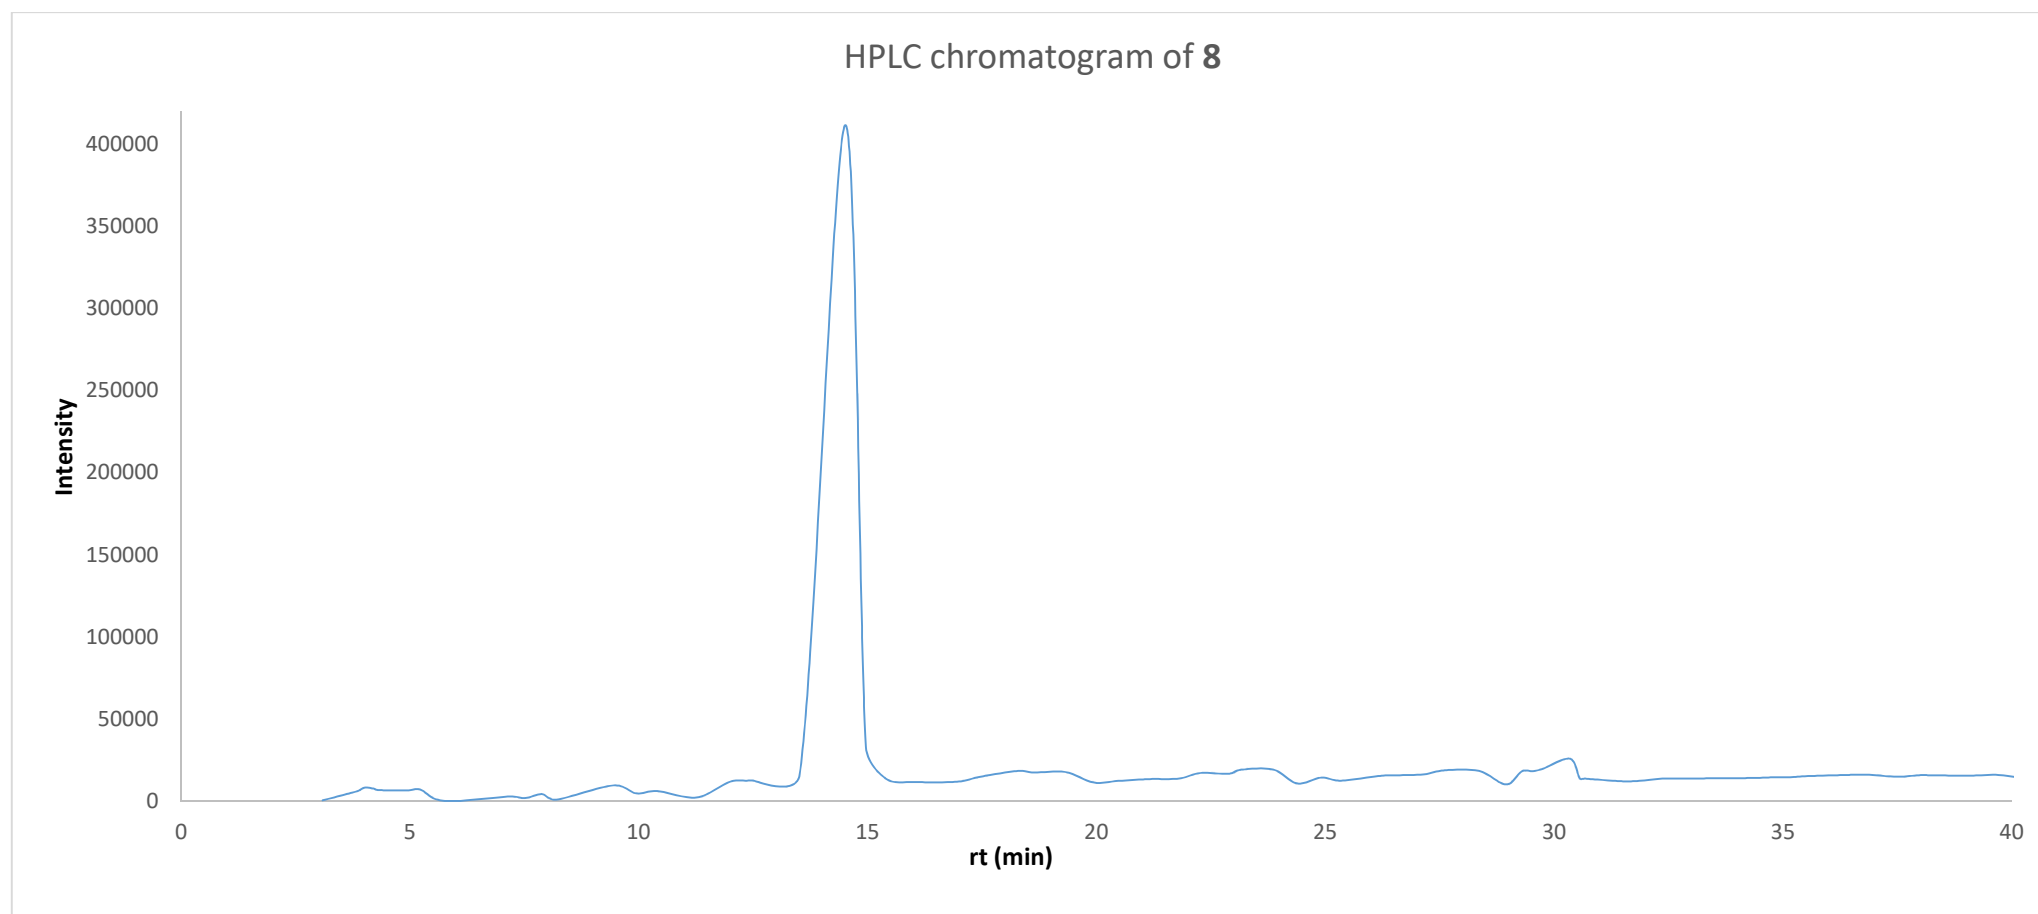

**Figure S9.** HPLC chromatogram of compound **8**

**Video S1.** Representative time lapse videos of PBS suspension of *E. coli*-pET30 bacteria labeled with *Safirinum* visualized by phase-contrast and fluorescence microscopy. The accelerated video corresponds to 2.5 sec. of phase contrast and 40 sec. of fluorescence original records. The focus was set to the dish bottom.
